# Supplementary material
Source: HighWire-hosted journal article supplement (https://www.annfammed.org/highwire/filestream/7959/field_highwire_adjunct_files/0/Newman_Appendix_1.pdf)
Supplement: Newman_Appendix_1.pdf [file Newman_Appendix_1.pdf]

**Online Supplementary Material**

Newman RJ, Nichols DB, Cummings DM. Outpatient colonoscopy by rural family physicians. *Ann Fam Med.* 2005;3:122-125.

<http://www.annfammed.org/cgi/content/full/3/2/122/DC1>

**Supplemental Appendix 1. Yield of Pathologic Findings In  
731 Colonoscopies**

| <b>Biopsy Finding</b> | <b>Total<br/>Number</b> | <b>Total<br/>Cases</b> | <b>Percent of<br/>Cases</b> |
|-----------------------|-------------------------|------------------------|-----------------------------|
| Adenomatous polyp     | 215                     | 156                    | 21.3                        |
| Villous adenoma       | 23                      | 23                     | 3.1                         |
| Adenocarcinoma        | 6                       | 6                      | 0.8                         |
| Colitis               | 24                      | 24                     | 3.3                         |
| Hyperplastic polyp    | 388                     | 231                    | 31.6                        |

Note: Data on findings of diverticuli, internal and external hemorrhoids, lipomas, and arteriovenous malformations were collected, but not reported here. Polyps were also categorized by size, as estimated by the colonoscopists, using the 7-mm-wide biopsy forceps as a reference. Of a total of 632 lesions, 547 (86.5%) were 0 to 5 mm, 53 (8.4%) were 6 to 10 mm, 21 (3.3%) were 1.1 to 2 cm, and 11 (1.7%) were >2 cm. The last category included all 6 cancers detected.
